# Supplementary material for: A Gleason score-related outcome model for human prostate cancer: a comprehensive study based on weighted gene co-expression network analysis
Source: Cancer Cell Int. 2020 May 11;20:159. doi: 10.1186/s12935-020-01230-x (PMC7216484; doi:10.1186/s12935-020-01230-x)
Supplement: Supplementary file 5 — Additional file 5: Table S4. Hub genes correlated with Gleason score via WGCNA analysis. [file 12935_2020_1230_MOESM5_ESM.xlsx]

## Sheet: Sheet1
Gene	Cor.yellow
EZH2	0.847537
HJURP	0.890456
MYBL2	0.890617
MKI67	0.865216
KIF4A	0.946945
MELK	0.931125
RRM2	0.905106
BUB1B	0.897178
CENPA	0.936487
BIRC5	0.875484
CCNB2	0.8096
GTSE1	0.931753
SKA3	0.923118
EPR1	0.865162
TROAP	0.906342
CDCA8	0.920699
FOXM1	0.928248
UBE2C	0.92533
NCAPG	0.932361
IQGAP3	0.927814
FAM64A	0.888663
PLK1	0.941736
CDC25C	0.918626
CDC20	0.925404
TRIP13	0.853412
CDCA5	0.940723
TPX2	0.972422
DLGAP5	0.92463
HMMR	0.894257
KIFC1	0.933911
PKMYT1	0.855714
SPAG5	0.952287
SKA1	0.901318
KIF20A	0.919401
SPC25	0.905416
PRC1	0.915689
CCNA2	0.92603
KIF18B	0.921892
CENPF	0.916871
CDKN3	0.914076
MLF1IP	0.874005
AURKB	0.863395
DEPDC1B	0.871168
KIAA0101	0.889016
NEK2	0.930671
TK1	0.85479
ERCC6L	0.901332
CDCA3	0.84261
FAM72B	0.897077
CDC45	0.834221
NEIL3	0.910857
NCAPH	0.905714
CEP55	0.913634
PBK	0.889447
TOP2A	0.909688
SHCBP1	0.883718
DIAPH3	0.84924
E2F2	0.862755
FAM72D	0.878407
ASF1B	0.925197
ASPM	0.881409
CENPE	0.886192
BUB1	0.899947
KIF14	0.893783
KIF2C	0.925479
PTTG1	0.834191
RAD54L	0.891726
UHRF1	0.872178
ESPL1	0.924103
NUF2	0.926675
NUSAP1	0.949479
CDK1	0.943862
EXO1	0.900784
