# Supplementary material for: A Gleason score-related outcome model for human prostate cancer: a comprehensive study based on weighted gene co-expression network analysis
Source: Cancer Cell Int. 2020 May 11;20:159. doi: 10.1186/s12935-020-01230-x (PMC7216484; doi:10.1186/s12935-020-01230-x)
Supplement: Supplementary file 13 — Additional file 13: Table S7. The results of GSVA analysis. [file 12935_2020_1230_MOESM13_ESM.xlsx]

## Sheet: Supplementary table 6 functiona
	logFC	AveExpr	t	P.Value	FDR	B
HALLMARK_E2F_TARGETS	0.497361	-0.0432376	20.2286	7.64e-65	3.82e-63	136.832
HALLMARK_G2M_CHECKPOINT	0.301307	-0.0248556	13.0808	2.87e-33	7.19e-32	64.3634
HALLMARK_MYC_TARGETS_V1	0.285587	-0.0350714	8.21219	2.43e-15	2.02e-14	23.4153
HALLMARK_MTORC1_SIGNALING	0.234985	-0.0266263	8.62087	1.2e-16	1.2e-15	26.3814
HALLMARK_MYC_TARGETS_V2	0.212201	-0.0368064	5.76778	1.51e-08	3.98e-08	8.05856
HALLMARK_DNA_REPAIR	0.168781	-0.0284886	7.21691	2.34e-12	1.06e-11	16.6465
HALLMARK_UNFOLDED_PROTEIN_RESPONSE	0.162024	-0.0280506	7.75313	6.26e-14	3.48e-13	20.2106
HALLMARK_OXIDATIVE_PHOSPHORYLATION	0.159867	-0.0339341	4.37035	1.55e-05	2.77e-05	1.36424
HALLMARK_GLYCOLYSIS	0.0786001	-0.0153107	4.07379	5.49e-05	8.9e-05	0.159548
HALLMARK_PI3K_AKT_MTOR_SIGNALING	0.0755037	-0.00842932	4.2323	2.82e-05	4.86e-05	0.793749
HALLMARK_PEROXISOME	0.0681486	-0.0155597	3.62935	0.00031744	0.000466824	-1.49819
HALLMARK_SPERMATOGENESIS	0.0519953	0.017753	4.69258	3.61e-06	6.93e-06	2.76091
HALLMARK_MITOTIC_SPINDLE	0.0435815	-0.00984092	2.09651	0.0366064	0.044642	-5.80589
HALLMARK_UV_RESPONSE_UP	0.0418878	-0.0141218	2.7616	0.00599221	0.00788449	-4.21027
HALLMARK_CHOLESTEROL_HOMEOSTASIS	0.0362746	-0.0201771	1.43156	0.152977	0.169975	-6.9717
HALLMARK_PROTEIN_SECRETION	0.0249857	-0.0124047	0.81478	0.415638	0.442169	-7.66313
HALLMARK_ANDROGEN_RESPONSE	0.00776938	-0.00727441	0.264749	0.791326	0.807476	-7.96011
HALLMARK_REACTIVE_OXIGEN_SPECIES_PATHWAY	0.00409669	-0.031683	0.14898	0.881637	0.881637	-7.98408
HALLMARK_ADIPOGENESIS	-0.00957565	-0.0133305	-0.551126	0.581827	0.606069	-7.8432
HALLMARK_FATTY_ACID_METABOLISM	-0.0169259	0.00480819	-0.847565	0.39714	0.431674	-7.63589
HALLMARK_P53_PATHWAY	-0.025704	-0.0250147	-1.68283	0.0931153	0.108274	-6.58213
HALLMARK_ESTROGEN_RESPONSE_LATE	-0.030815	-0.00468839	-1.58963	0.112635	0.127995	-6.73389
HALLMARK_HEME_METABOLISM	-0.0409172	-0.0027417	-3.3839	0.000778487	0.00111212	-2.33645
HALLMARK_COAGULATION	-0.0438587	0.017533	-2.16772	0.0307144	0.0383931	-5.65544
HALLMARK_XENOBIOTIC_METABOLISM	-0.0503243	-0.00613224	-2.64135	0.00855098	0.0109628	-4.53017
HALLMARK_TGF_BETA_SIGNALING	-0.0504322	-0.0101411	-1.89555	0.0586739	0.0698499	-6.20387
HALLMARK_WNT_BETA_CATENIN_SIGNALING	-0.0728067	0.00234451	-2.94231	0.00342958	0.00463457	-3.70367
HALLMARK_BILE_ACID_METABOLISM	-0.0744096	-0.000450829	-4.63331	4.74e-06	8.79e-06	2.49723
HALLMARK_PANCREAS_BETA_CELLS	-0.0827958	0.0281893	-3.31376	0.000996409	0.0013839	-2.56577
HALLMARK_APOPTOSIS	-0.096013	-0.00862094	-5.5601	4.68e-08	1.17e-07	6.96087
HALLMARK_NOTCH_SIGNALING	-0.0991943	-0.00835649	-4.07243	5.52e-05	8.9e-05	0.154175
HALLMARK_ESTROGEN_RESPONSE_EARLY	-0.100552	-0.00621576	-5.93786	5.86e-09	1.72e-08	8.98318
HALLMARK_IL2_STAT5_SIGNALING	-0.106837	-0.0145681	-5.50279	6.35e-08	1.44e-07	6.66415
HALLMARK_KRAS_SIGNALING_DN	-0.115651	0.0199919	-8.63236	1.1e-16	1.2e-15	26.4664
HALLMARK_ALLOGRAFT_REJECTION	-0.118922	-0.0154297	-3.85276	0.00013413	0.000203227	-0.687242
HALLMARK_COMPLEMENT	-0.119342	-0.00910071	-5.31858	1.67e-07	3.62e-07	5.72853
HALLMARK_HYPOXIA	-0.125275	-0.00291881	-6.67517	7.44e-11	2.66e-10	13.2517
HALLMARK_INTERFERON_GAMMA_RESPONSE	-0.133918	-0.012011	-3.88429	0.000118368	0.00018495	-0.569147
HALLMARK_INFLAMMATORY_RESPONSE	-0.147949	-0.00354016	-4.92161	1.21e-06	2.43e-06	3.80816
HALLMARK_INTERFERON_ALPHA_RESPONSE	-0.162574	-0.0123877	-5.09473	5.19e-07	1.08e-06	4.62939
HALLMARK_KRAS_SIGNALING_UP	-0.16398	2.79e-06	-8.15419	3.69e-15	2.63e-14	23.0028
HALLMARK_APICAL_JUNCTION	-0.169648	-0.00435057	-8.00542	1.07e-14	6.67e-14	21.9549
HALLMARK_EPITHELIAL_MESENCHYMAL_TRANSITION	-0.172011	-0.00507172	-5.51746	5.88e-08	1.4e-07	6.73986
HALLMARK_HEDGEHOG_SIGNALING	-0.174721	0.00413953	-5.91751	6.57e-09	1.83e-08	8.87134
HALLMARK_UV_RESPONSE_DN	-0.178942	0.000720882	-6.35048	5.35e-10	1.67e-09	11.3207
HALLMARK_IL6_JAK_STAT3_SIGNALING	-0.188062	0.0165274	-7.3596	9.1e-13	4.55e-12	17.5755
HALLMARK_TNFA_SIGNALING_VIA_NFKB	-0.195634	-0.0273536	-6.58912	1.26e-10	4.21e-10	12.7322
HALLMARK_MYOGENESIS	-0.216276	-0.0137151	-7.01499	8.71e-12	3.35e-11	15.3563
HALLMARK_APICAL_SURFACE	-0.224852	0.00094615	-9.86524	7.09e-21	1.18e-19	36.0195
HALLMARK_ANGIOGENESIS	-0.225052	0.0272774	-7.11734	4.49e-12	1.87e-11	16.0067
